# Supplementary material
Source: publisher site journal article supplement (http://kjim.org/upload/media/kjim-2023-273-Supplementary-Table-2.pdf)
Supplement: Supplementary file 1 [file kjim-2023-273-Supplementary-Table-2.pdf]

**Supplementary Table 2. Clinical outcomes of patients with IPF treated with mechanical ventilation**

| Outcome                     | Total<br>(n = 1,227) | 2011<br>(n = 55) | 2012<br>(n = 98) | 2013<br>(n = 97) | 2014<br>(n = 120) | 2015<br>(n = 151) | 2016<br>(n = 174) | 2017<br>(n = 162) | 2018<br>(n = 181) | 2019<br>(n = 189) | <i>p</i> value |
|-----------------------------|----------------------|------------------|------------------|------------------|-------------------|-------------------|-------------------|-------------------|-------------------|-------------------|----------------|
| Hospital mortality          | 852 (69.44)          | 35 (63.64)       | 70 (71.43)       | 71 (73.20)       | 87 (72.50)        | 103 (68.21)       | 126 (72.41)       | 116 (71.60)       | 124 (68.51)       | 120 (63.49)       | 0.277          |
| Length of hospital stay (d) | 16.40 ± 15.54        | 19.29 ± 15.23    | 17.08 ± 15.53    | 18.67 ± 15.05    | 15.73 ± 15.08     | 14.00 ± 15.33     | 16.87 ± 14.61     | 13.51 ± 13.33     | 18.16 ± 17.56     | 16.75 ± 16.51     | 0.521          |
| 30-day mortality            | 843 (68.70)          | 36 (65.45)       | 65 (66.33)       | 65 (67.01)       | 85 (70.83)        | 110 (72.85)       | 117 (67.24)       | 123 (75.93)       | 120 (66.30)       | 122 (64.55)       | 0.821          |
| 90-day mortality            | 1,046 (85.25)        | 50 (90.91)       | 88 (89.80)       | 83 (85.57)       | 103 (85.83)       | 132 (87.42)       | 146 (83.91)       | 141 (87.04)       | 146 (80.86)       | 157 (83.07)       | 0.028          |

Values are presented as number (%) or mean ± standard deviation.

IPF, idiopathic pulmonary fibrosis.

Annual trends in mortality and length of hospital stay were assessed using the Cochran-Armitage trend test and simple linear regression, respectively.
